# Supplementary material
Source: PubMed Central journal article supplement (PMC3591991)
Supplement: JB.02191-12_zjb999092473so1.pdf [file JB.02191-12_zjb999092473so1.pdf]

## SUPPLEMENTAL DATA

Belonging to the manuscript:

**The ROK-family regulator Rok7B7 pleiotropically affects xylose utilization, carbon catabolite repression and antibiotic production in *Streptomyces coelicolor***

by

Magdalena A. Świątek, Jacob Gubbens, Giselda Bucca, Eunjung Song, Yung-Hun Yang, Emma Laing, Byung-Gee Kim, Colin P. Smith, and Gilles P. van Wezel

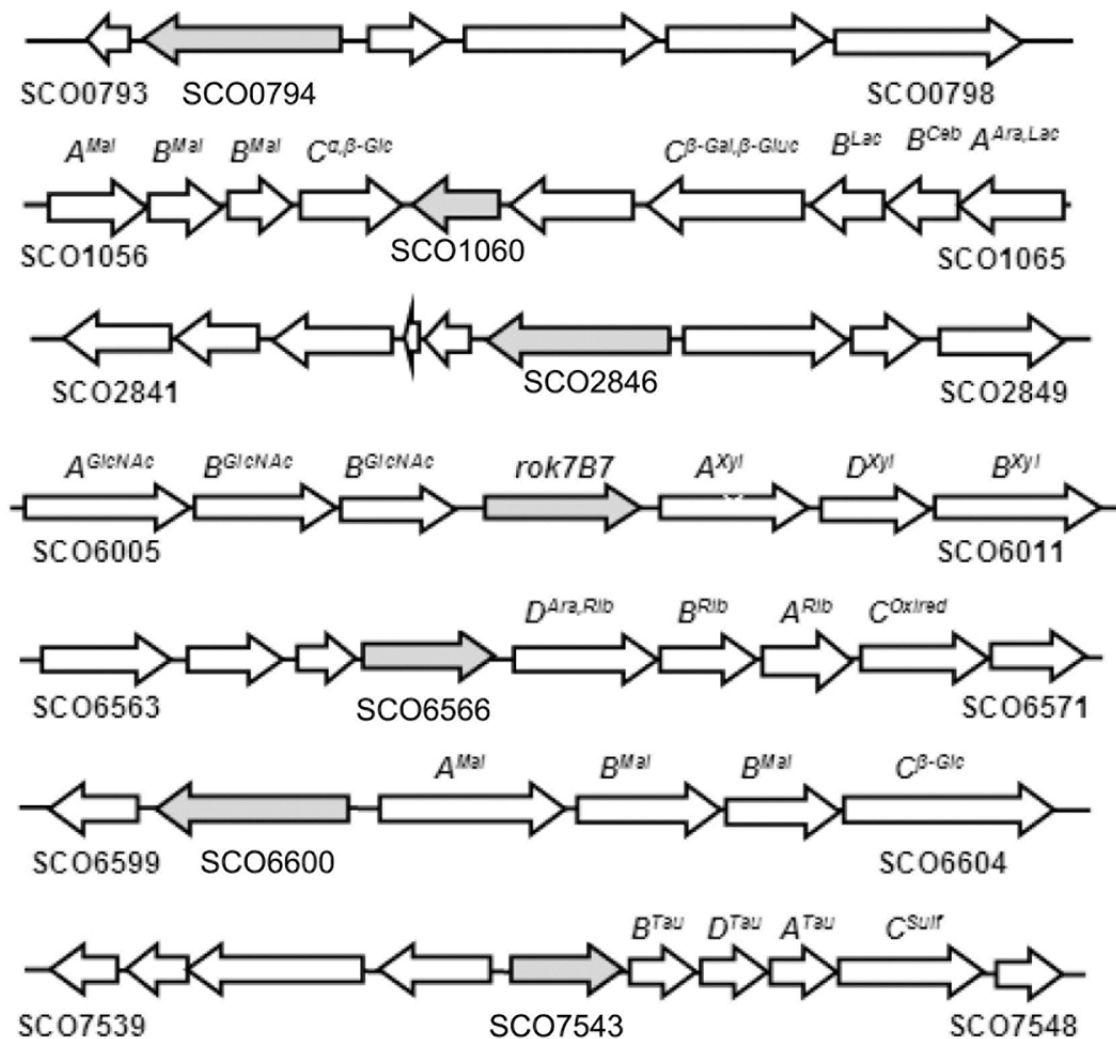

**Figure S1. Genomic environment of the *rok* genes studied in this work.** The genetic environments of SCO0794, SCO1060, SCO2846, SCO6008 (*rok7B7*), SCO6566, SCO6600 and SCO7543 (*rok* genes shaded in grey) are indicated, with ORFs represented by arrows. *S. coelicolor* reference numbers (SCO) for the ORFs are given for the first and last ORFs of each cluster of genes. Genes encoding substrate-binding proteins, membrane proteins, ATPases and catabolic enzymes are marked with suffixes A, B, C and D, respectively. The known or predicted substrates of the ABC transporters are indicated. Abbreviations: Mal – maltose;  $\alpha,\beta$ -Glu -  $\alpha,\beta$ -glucosidase;  $\beta$ -Gal –  $\beta$ -galactosidase;  $\beta$ -Glu -  $\beta$ -glucosidase; Lac – lactose; Ceb – cellobiose; Ara – arabinose; GlcNAc- *N*-acetylglucosamine; Xyl – xylose; Rib – ribose; Oxired – oxidoreductase; Tau – taurine; Sulf – sulfonate.

**Table S1. Strains of *Streptomyces coelicolor* A3(2) described in this study.**

| Strain | Genotype #                                            | Reference |
|--------|-------------------------------------------------------|-----------|
| M145   | prototrophic SCP1 <sup>-</sup> SCP2 <sup>-</sup>      | (3)       |
| GAM20  | M145 SCO0794:: <i>aacC4</i> , Apr <sup>R</sup>        | This work |
| GAM21  | M145 SCO1060:: <i>aacC4</i> , Apr <sup>R</sup>        | This work |
| GAM22  | M145 SCO2846:: <i>aacC4</i> , Apr <sup>R</sup>        | This work |
| GAM23  | M145 SCO6008:: <i>aacC4</i> , Apr <sup>R</sup>        | This work |
| GAM24  | M145 SCO6566:: <i>aacC4</i> , Apr <sup>R</sup>        | This work |
| GAM25  | M145 SCO6600:: <i>aacC4</i> , Apr <sup>R</sup>        | This work |
| GAM26  | M145 SCO7543:: <i>aacC4</i> , Apr <sup>R</sup>        | This work |
| GAM30  | M145 $\Delta$ SCO0794 D                               | This work |
| GAM31  | M145 $\Delta$ SCO1060 D                               | This work |
| GAM32  | M145 $\Delta$ SCO2846 D                               | This work |
| GAM33  | M145 $\Delta$ SCO6008 D                               | This work |
| GAM34  | M145 $\Delta$ SCO6566 D                               | This work |
| GAM35  | M145 $\Delta$ SCO6600 D                               | This work |
| GAM36  | M145 $\Delta$ SCO7543 D                               | This work |
| DM9    | M145 $\Delta$ <i>redD</i> $\Delta$ <i>actII</i> -ORF4 | (2)       |

# Apr, apramycin resistant; D, deletion mutant

**Table S2. Plasmids constructs used in this study.**

| <b>Plasmid</b> | <b>Description</b>                                                                                                                                          | <b>Reference</b> |
|----------------|-------------------------------------------------------------------------------------------------------------------------------------------------------------|------------------|
| pWHM3          | Cloning vector, <i>colE1</i> replicon, pSG5 replicon, TsrR, AmpR                                                                                            | (4)              |
| pUWLcre        | pUWLoriT derivative with <i>cre(a)</i> gene under <i>ermE*</i> promoter                                                                                     | (1)              |
| pGAM8          | pWHM3 containing flanking regions of <i>S. coelicolor</i> SCO0794 with apraloxP_ <i>Xba</i> I inserted between them in pWHM3 <i>Eco</i> RI- <i>Hind</i> III | This work        |
| pGAM9          | pWHM3 containing flanking regions of <i>S. coelicolor</i> SCO1060 with apraloxP_ <i>Xba</i> I inserted between them in pWHM3 <i>Eco</i> RI- <i>Hind</i> III | This work        |
| pGAM10         | pWHM3 containing flanking regions of <i>S. coelicolor</i> SCO2846 with apraloxP_ <i>Xba</i> I inserted between them in pWHM3 <i>Eco</i> RI- <i>Hind</i> III | This work        |
| pGAM11         | pWHM3 containing flanking regions of <i>S. coelicolor</i> SCO6008 with apraloxP_ <i>Xba</i> I inserted between them in pWHM3 <i>Eco</i> RI- <i>Hind</i> III | This work        |
| pGAM12         | pWHM3 containing flanking regions of <i>S. coelicolor</i> SCO6566 with apraloxP_ <i>Xba</i> I inserted between them in pWHM3 <i>Eco</i> RI- <i>Hind</i> III | This work        |
| pGAM13         | pWHM3 containing flanking regions of <i>S. coelicolor</i> SCO6600 with apraloxP_ <i>Xba</i> I inserted between them in pWHM3 <i>Eco</i> RI- <i>Hind</i> III | This work        |
| pGAM14         | pWHM3 containing flanking regions of <i>S. coelicolor</i> SCO7543 with apraloxP_ <i>Xba</i> I inserted between them in pWHM3 <i>Eco</i> RI- <i>Hind</i> III | This work        |
| pGAM15         | pSET152 containing the <i>rok7B7</i> gene with its promoter and a C-terminal triple FLAG-tag epitope                                                        | This work        |

**Table S3. Oligos used in this study.** Restriction sites used for cloning are in bold and underlined. GGATTC, *Bam*HI; GAATTC, *Eco*RI; TCTAGA, *Xba*I; AAGCTT, *Hind*III; CATATG, *Nde*I; CTCGAG, *Xho*I. For scheme of primer design see image at the end of the table.

| Name #               | 5'-3' sequence                                           |
|----------------------|----------------------------------------------------------|
| 0794LF-1497          | gtcagaattc <b>acc</b> cggggattgaaccgcaggct               |
| 0794LR+6             | gaagttatccatcacct <b>ctagac</b> gccatgtggctcctcccgta     |
| 0794RF+1285          | gaagttatcgcgcatct <b>ctagac</b> actgaggtttcgccggtcgc     |
| 0794RR+2699          | gtc <b>caaag</b> cttcgggcagcaaaatcgtggtcacg              |
| 1060LF-1387          | gtcagaattc <b>ggg</b> ctgggacatcgaggcaccgct              |
| 1060LR+9             | gaagttatccatcacct <b>ctagag</b> ttcatcatgggtgctgtcgag    |
| 1060RF+1228(48)      | gaagttatcgcgcatct <b>ctagac</b> gggacgcggggctgacacgga    |
| 1060RR+2552(74)      | gtc <b>caaag</b> cttgcgacacgctcgatctgggacacc             |
| 2846LF-1369          | gtcagaattc <b>ctt</b> gcgggcgatccaggcgtcgt               |
| 2846LR+9             | gaagttatccatcacct <b>ctagac</b> ctgttcacacccccattgtc     |
| 2846RF+1224          | gaagttatcgcgcatct <b>ctagac</b> ggggggacggcgggctgagac    |
| 2846RR+2637          | gtc <b>caaag</b> ctttcagacccgttccacgaggtcc               |
| 6008LF-848new        | gtcagaattctgatcgtcgtgggtctcggcactg                       |
| 6008LR+147new        | gaagttatccatcacct <b>ctagac</b> ccggacgatgttcgagaccgctcg |
| 6008RF+1201loxPnew   | gaagttatcgcgcatct <b>ctagac</b> cttcaacttagagcacggatgg   |
| 6008RR+2675(97)      | gtc <b>caaag</b> cttagctctacgctcggtagcgcct               |
| 6566LF-1406          | gtcagaattc <b>cg</b> cgggacaagatgtccgaggtc               |
| 6566LR+6             | gaagttatccatcacct <b>ctagag</b> gacacgacgaggccgcccgg     |
| 6566RF+1398          | gaagttatcgcgcatct <b>ctagac</b> gctagccaccaccttcaact     |
| 6566RR+2677          | gtc <b>caaag</b> cttagaccgacacgcttgccgggtgac             |
| 6600LF-1371          | gtcagaattctcgaactgcgactcgtcgggca                         |
| 6600LR+6             | gaagttatccatcacct <b>ctagag</b> gccatccggcccctcccttt     |
| 6600RF+1321(41)      | gaagttatcgcgcatct <b>ctagag</b> gatgaggccgtgcgcgcgggc    |
| 6600RR+2671(93)      | gtc <b>caaag</b> ctttgcccgtgagctacgtcgacctg              |
| 7543LF-1253          | gtcagaattc <b>ac</b> gggtgccgctcggcgttgac                |
| 7543LR+6             | gaagttatccatcacct <b>ctagag</b> gtcaaggtagggaggctcga     |
| 7543RF+1270(90)      | gaagttatcgcgcatct <b>ctagac</b> cttgacaagcggagtgccga     |
| 7543RR+2635(57)      | gtc <b>caaag</b> ctttccatcagcaggatcgaggggtc              |
| 0794check-451        | gtcagaattctgggtcaggcacagcgcgcacatg                       |
| 0794check+1728(51)   | gtc <b>caaag</b> cttagttcctgccccgactgcggcag              |
| 1060check-501        | gtcagaattctcggcaccggcaaccagtgccag                        |
| 1060check+1695(1718) | gtc <b>caaag</b> cttgccacggacaaccgctacgagg               |
| 2846check-687        | gtcagaattc <b>act</b> cggcgtacacctgcgtgacc               |
| 2846check+1886(1907) | gtc <b>caaag</b> cttaccctcctcatgtcgggtgagc               |
| 6008check-689        | gtcagaattctccagttgcagaacttcgggctg                        |
| 6008check+1923(46)   | gtc <b>caaag</b> ctttcaccttgccgtcgaggacggag              |
| 6566check-541        | gtcagaattc <b>ac</b> accgagggctgggtcgatctg               |
| 6566check+1898(1921) | gtc <b>caaag</b> ctttcggctcgtgaccgaggtggacg              |
| 6600check-549        | gtcagaattctcgaagttcttggcgtcccagg                         |
| 6600check+1880(1901) | gtc <b>caaag</b> ctttggtagcgcgcccgggatctcg               |
| 7543check-626        | gtcagaattc <b>ag</b> ccacacgaagatgccgtcg                 |
| 7543check+1894(1917) | gtc <b>caaag</b> cttacgccccgaagatcgtggcgtc               |
| xylG_for             | tccgtctcgatcaacaggccgca                                  |
| xylG_rev             | aggcgatcggatgcggacgctc                                   |
| RTgIcP1_for          | agctgggtcaactggggctct                                    |

|             |                         |
|-------------|-------------------------|
| RTglcP1_rev | gtcgaagtccacgtccttg     |
| rpsl_for    | gagaccactcccagcagccgc   |
| rpsl_rev    | gtagcggttgtccagctcgagca |

**# schematic representation of primer design for creating the knock-out constructs**

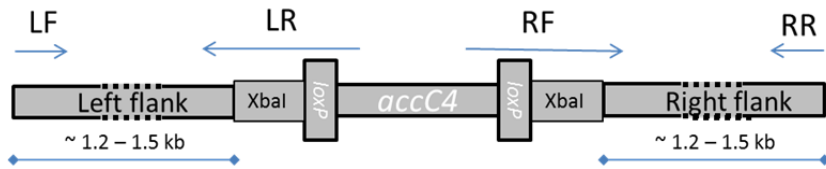

**Table S4. Genes that show more than two-fold up- or down- regulation in transcription between *S. coelicolor* M145 and its *rok7B7* null mutant in MM mannitol solid-grown cultures. (\*)**

| Gene    | Name         | Rok7B7/M145 ratio |       |       |       |       |       |
|---------|--------------|-------------------|-------|-------|-------|-------|-------|
|         |              | 14 h              | 24 h  | 30 h  | 36 h  | 42 h  | 54 h  |
| SCO0007 |              | 1,050             | 0,832 | 0,943 | 0,938 | 0,420 | 1,856 |
| SCO0013 |              | 1,137             | 0,800 | 1,001 | 0,838 | 0,407 | 0,965 |
| SCO0022 |              | 1,389             | 1,203 | 1,199 | 1,252 | 1,222 | 2,618 |
| SCO0045 |              | 0,809             | 1,387 | 0,889 | 0,768 | 2,038 | 1,013 |
| SCO0056 |              | 1,185             | 0,993 | 0,917 | 1,012 | 0,727 | 2,008 |
| SCO0182 |              | 0,842             | 0,906 | 1,034 | 1,029 | 0,483 | 1,464 |
| SCO0190 | <i>crtT</i>  | 2,091             | 1,703 | 1,538 | 1,360 | 0,931 | 0,958 |
| SCO0194 |              | 1,199             | 1,019 | 0,886 | 2,152 | 0,872 | 1,974 |
| SCO0251 |              | 1,895             | 0,692 | 0,751 | 0,825 | 0,204 | 2,823 |
| SCO0436 |              | 0,864             | 0,737 | 1,335 | 0,871 | 1,207 | 2,109 |
| SCO0527 | <i>scoF</i>  | 1,304             | 1,080 | 0,939 | 1,062 | 0,486 | 2,048 |
| SCO0779 |              | 0,950             | 0,716 | 0,954 | 0,882 | 0,337 | 1,498 |
| SCO0861 |              | 1,212             | 1,238 | 1,353 | 2,037 | 1,707 | 0,961 |
| SCO0949 |              | 1,057             | 0,871 | 1,010 | 0,974 | 0,491 | 1,194 |
| SCO0989 |              | 0,933             | 0,665 | 0,983 | 0,768 | 0,394 | 1,077 |
| SCO1027 |              | 1,053             | 1,099 | 0,993 | 0,878 | 0,393 | 2,787 |
| SCO1082 |              | 1,045             | 1,152 | 1,025 | 0,431 | 1,119 | 0,610 |
| SCO1255 | <i>mug</i>   | 1,049             | 0,938 | 1,032 | 0,809 | 0,424 | 1,946 |
| SCO1389 | <i>cls</i>   | 1,104             | 1,182 | 0,967 | 1,110 | 1,225 | 2,570 |
| SCO1426 |              | 0,973             | 0,982 | 1,107 | 1,461 | 2,096 | 0,697 |
| SCO1431 |              | 1,024             | 0,845 | 1,158 | 0,757 | 0,437 | 2,868 |
| SCO1480 |              | 0,945             | 0,978 | 1,124 | 1,117 | 0,625 | 2,264 |
| SCO1599 | <i>rpml</i>  | 1,421             | 1,100 | 1,008 | 1,130 | 0,337 | 4,874 |
| SCO1675 | <i>chpH</i>  | 1,622             | 1,107 | 1,072 | 0,988 | 0,542 | 4,044 |
| SCO1721 |              | 0,989             | 0,870 | 1,055 | 1,083 | 0,427 | 1,726 |
| SCO1800 | <i>chpE</i>  | 1,869             | 1,281 | 1,084 | 0,988 | 0,555 | 4,642 |
| SCO1828 |              | 0,995             | 1,050 | 1,127 | 1,407 | 0,513 | 2,893 |
| SCO1839 |              | 1,536             | 1,347 | 1,125 | 0,930 | 0,474 | 2,984 |
| SCO1914 |              | 1,394             | 1,012 | 0,999 | 0,898 | 0,154 | 8,244 |
| SCO1978 |              | 1,224             | 0,886 | 0,969 | 0,779 | 0,387 | 2,856 |
| SCO2113 | <i>bfr</i>   | 0,400             | 0,605 | 0,996 | 1,386 | 0,779 | 0,907 |
| SCO2156 | <i>cox</i>   | 1,216             | 1,033 | 1,030 | 1,122 | 0,465 | 1,338 |
| SCO2210 | <i>glnII</i> | 1,076             | 1,535 | 0,787 | 2,612 | 1,108 | 1,368 |
| SCO2261 |              | 1,055             | 0,810 | 0,901 | 0,741 | 0,454 | 0,919 |
| SCO2338 |              | 0,951             | 0,818 | 0,916 | 1,179 | 0,531 | 2,164 |
| SCO2354 |              | 0,959             | 1,084 | 1,122 | 0,992 | 0,590 | 2,517 |
| SCO2494 |              | 0,473             | 0,406 | 0,582 | 0,839 | 0,753 | 0,897 |
| SCO2636 |              | 0,881             | 0,925 | 1,005 | 1,017 | 1,814 | 0,503 |
| SCO2698 |              | 1,272             | 1,423 | 1,133 | 0,431 | 1,175 | 1,048 |
| SCO2717 | <i>chpD</i>  | 1,856             | 1,389 | 1,077 | 0,754 | 0,537 | 3,267 |
| SCO2718 | <i>rdIA</i>  | 1,789             | 1,717 | 1,056 | 0,996 | 0,279 | 8,120 |

|         |              |       |       |       |       |       |       |
|---------|--------------|-------|-------|-------|-------|-------|-------|
| SCO2719 | <i>rdlB</i>  | 1,607 | 1,795 | 1,041 | 1,240 | 0,448 | 3,617 |
| SCO2727 |              | 0,915 | 1,074 | 1,080 | 1,182 | 0,484 | 1,314 |
| SCO3113 |              | 1,302 | 1,328 | 1,303 | 1,134 | 0,965 | 4,222 |
| SCO3152 |              | 0,941 | 1,043 | 1,058 | 0,895 | 2,054 | 0,668 |
| SCO3255 | <i>spdB</i>  | 1,103 | 0,874 | 0,998 | 0,814 | 0,459 | 1,390 |
| SCO3262 |              | 1,454 | 1,432 | 1,013 | 1,208 | 1,372 | 0,408 |
| SCO3263 |              | 0,995 | 1,245 | 1,157 | 0,525 | 1,697 | 0,481 |
| SCO3289 |              | 2,078 | 1,586 | 1,168 | 1,182 | 1,115 | 0,922 |
| SCO3327 |              | 1,411 | 1,191 | 1,060 | 0,965 | 0,433 | 2,943 |
| SCO3342 |              | 0,779 | 1,406 | 0,610 | 0,839 | 1,926 | 0,465 |
| SCO3461 |              | 1,120 | 0,919 | 1,057 | 0,908 | 0,470 | 1,699 |
| SCO3475 |              | 1,429 | 0,848 | 1,128 | 1,904 | 0,692 | 2,169 |
| SCO3476 |              | 1,255 | 0,865 | 1,049 | 1,493 | 0,774 | 2,015 |
| SCO3478 |              | 1,235 | 0,832 | 1,019 | 1,663 | 0,846 | 2,022 |
| SCO3481 |              | 1,268 | 0,767 | 1,181 | 1,705 | 0,622 | 2,628 |
| SCO3482 |              | 1,311 | 0,856 | 1,087 | 1,674 | 0,732 | 2,304 |
| SCO3483 |              | 1,123 | 0,788 | 1,196 | 1,474 | 0,708 | 2,849 |
| SCO3484 |              | 1,385 | 0,744 | 1,178 | 1,667 | 0,688 | 2,982 |
| SCO3485 |              | 1,095 | 0,962 | 1,142 | 1,260 | 1,062 | 2,099 |
| SCO3486 |              | 1,231 | 0,855 | 1,081 | 1,234 | 0,833 | 2,445 |
| SCO3487 |              | 1,217 | 0,793 | 1,080 | 1,884 | 0,444 | 3,733 |
| SCO3488 |              | 1,052 | 0,784 | 1,143 | 1,933 | 0,695 | 2,817 |
| SCO3492 |              | 1,011 | 1,137 | 1,065 | 1,311 | 0,904 | 6,844 |
| SCO3549 | <i>bldG</i>  | 1,133 | 1,054 | 1,119 | 1,213 | 0,576 | 2,049 |
| SCO3731 | <i>scoF1</i> | 1,458 | 1,117 | 0,960 | 0,893 | 0,516 | 2,024 |
| SCO3748 | <i>f40</i>   | 1,594 | 1,267 | 0,815 | 0,911 | 0,423 | 3,122 |
| SCO3762 |              | 1,103 | 1,053 | 0,959 | 0,980 | 0,344 | 2,599 |
| SCO3868 |              | 0,972 | 0,825 | 1,013 | 0,820 | 0,422 | 1,092 |
| SCO3887 | <i>parB</i>  | 0,964 | 0,965 | 1,074 | 1,090 | 0,465 | 2,004 |
| SCO3906 | <i>rpsF</i>  | 1,411 | 1,132 | 0,933 | 1,047 | 0,473 | 1,122 |
| SCO3908 | <i>rpsR</i>  | 1,489 | 1,164 | 0,983 | 1,088 | 0,437 | 1,305 |
| SCO3938 | <i>thiC</i>  | 1,144 | 0,914 | 1,036 | 1,118 | 0,197 | 4,461 |
| SCO3990 |              | 1,049 | 1,146 | 0,857 | 0,606 | 2,213 | 0,785 |
| SCO3992 |              | 1,381 | 1,624 | 1,180 | 0,843 | 2,708 | 0,921 |
| SCO3993 |              | 1,065 | 1,430 | 1,245 | 0,948 | 2,192 | 0,529 |
| SCO4005 |              | 0,941 | 1,218 | 0,940 | 1,027 | 1,640 | 0,483 |
| SCO4011 |              | 0,950 | 0,903 | 1,024 | 0,738 | 1,491 | 0,439 |
| SCO4063 |              | 1,174 | 1,070 | 0,965 | 0,565 | 2,092 | 0,669 |
| SCO4212 |              | 1,102 | 0,547 | 0,968 | 0,512 | 0,048 | 2,180 |
| SCO4225 |              | 1,039 | 0,940 | 1,014 | 0,686 | 1,630 | 0,450 |
| SCO4261 |              | 1,176 | 0,832 | 0,954 | 0,885 | 0,306 | 1,570 |
| SCO4289 |              | 0,752 | 1,241 | 0,879 | 0,928 | 2,713 | 0,369 |
| SCO4424 |              | 1,009 | 0,887 | 0,937 | 1,237 | 1,735 | 0,480 |
| SCO4442 |              | 1,452 | 1,129 | 1,310 | 0,909 | 0,338 | 3,005 |
| SCO4635 | <i>rpmG3</i> | 1,315 | 0,991 | 1,095 | 1,028 | 0,404 | 2,221 |
| SCO4652 | <i>rpiI</i>  | 1,175 | 0,984 | 0,971 | 1,075 | 0,428 | 1,825 |



|         |              |       |       |       |       |       |       |
|---------|--------------|-------|-------|-------|-------|-------|-------|
| SCO4659 | <i>rspL</i>  | 1,388 | 1,055 | 0,942 | 1,004 | 0,398 | 1,470 |
| SCO4660 | <i>rspG</i>  | 1,488 | 1,086 | 0,943 | 1,021 | 0,423 | 1,405 |
| SCO4701 | <i>rpsJ</i>  | 1,459 | 1,131 | 0,911 | 0,887 | 0,419 | 1,558 |
| SCO4702 | <i>rplC</i>  | 1,599 | 1,106 | 0,917 | 0,968 | 0,402 | 1,799 |
| SCO4704 | <i>rplW</i>  | 1,280 | 1,035 | 1,006 | 0,923 | 0,430 | 2,667 |
| SCO4706 | <i>rpsS</i>  | 1,651 | 1,075 | 0,942 | 1,001 | 0,327 | 2,397 |
| SCO4711 | <i>rpsQ</i>  | 1,364 | 1,086 | 1,033 | 0,894 | 0,272 | 4,002 |
| SCO4712 | <i>rplN</i>  | 1,386 | 1,115 | 0,983 | 0,900 | 0,418 | 1,893 |
| SCO4713 | <i>rplX</i>  | 1,325 | 1,076 | 0,998 | 0,878 | 0,440 | 0,995 |
| SCO4714 | <i>rplE</i>  | 1,461 | 1,070 | 0,927 | 0,929 | 0,344 | 1,793 |
| SCO4715 | <i>rpsN</i>  | 1,251 | 0,993 | 0,973 | 1,003 | 0,413 | 2,338 |
| SCO4716 | <i>rpsH</i>  | 1,322 | 1,035 | 0,913 | 0,951 | 0,480 | 1,548 |
| SCO4717 | <i>rplF</i>  | 1,341 | 0,996 | 0,977 | 1,000 | 0,493 | 1,485 |
| SCO4720 | <i>rpmD</i>  | 1,161 | 0,993 | 0,946 | 1,012 | 0,366 | 3,901 |
| SCO4721 | <i>rplO</i>  | 1,261 | 1,052 | 0,936 | 1,018 | 0,359 | 2,015 |
| SCO4730 | <i>rplQ</i>  | 1,390 | 1,047 | 0,918 | 0,963 | 0,475 | 2,452 |
| SCO4761 | <i>groES</i> | 0,960 | 0,872 | 0,949 | 1,391 | 0,435 | 1,524 |
| SCO4894 |              | 0,956 | 0,910 | 1,080 | 0,635 | 2,013 | 0,849 |
| SCO4903 |              | 0,921 | 1,088 | 0,982 | 0,822 | 1,762 | 0,460 |
| SCO5029 |              | 1,290 | 1,032 | 1,088 | 1,126 | 0,497 | 1,622 |
| SCO5191 |              | 1,276 | 1,454 | 0,995 | 1,298 | 0,319 | 1,708 |
| SCO5227 | <i>nrdX</i>  | 0,812 | 0,782 | 1,033 | 0,985 | 0,529 | 2,819 |
| SCO5240 |              | 1,519 | 1,201 | 0,936 | 1,328 | 0,484 | 2,311 |
| SCO5326 |              | 0,966 | 1,569 | 1,012 | 0,490 | 2,565 | 0,477 |
| SCO5490 |              | 1,127 | 0,921 | 0,909 | 0,768 | 0,386 | 1,260 |
| SCO5578 | <i>glcP1</i> | 8,691 | 7,028 | 6,642 | 5,109 | 2,671 | 1,519 |
| SCO5583 | <i>amtB</i>  | 1,172 | 1,508 | 0,797 | 2,727 | 1,021 | 1,485 |
| SCO5584 | <i>glnK</i>  | 1,136 | 1,329 | 0,878 | 2,116 | 0,976 | 1,710 |
| SCO5609 |              | 1,171 | 0,743 | 0,974 | 1,055 | 0,088 | 3,108 |
| SCO5639 |              | 1,584 | 1,564 | 1,169 | 0,708 | 2,045 | 0,678 |
| SCO5742 |              | 1,042 | 1,944 | 0,923 | 0,538 | 2,107 | 0,808 |
| SCO5824 |              | 0,980 | 0,834 | 0,956 | 0,777 | 0,495 | 1,338 |
| SCO5907 |              | 1,042 | 0,748 | 0,758 | 0,761 | 0,405 | 1,952 |
| SCO5918 |              | 1,359 | 1,019 | 0,504 | 0,587 | 1,201 | 1,051 |
| SCO5920 |              | 1,282 | 1,003 | 0,406 | 0,807 | 1,233 | 0,936 |
| SCO5978 |              | 0,947 | 0,888 | 0,964 | 0,990 | 0,641 | 2,240 |
| SCO5987 |              | 1,118 | 0,938 | 1,154 | 1,228 | 2,318 | 0,419 |
| SCO6009 | <i>xyIF</i>  | 3,530 | 2,202 | 1,982 | 2,337 | 1,105 | 1,803 |
| SCO6010 | <i>xyIG</i>  | 5,801 | 4,696 | 4,511 | 3,305 | 2,717 | 1,656 |
| SCO6011 | <i>xyIH</i>  | 2,056 | 1,566 | 1,464 | 1,459 | 1,295 | 1,110 |
| SCO6026 |              | 0,903 | 1,209 | 0,939 | 0,465 | 0,973 | 1,031 |
| SCO6027 |              | 0,906 | 1,076 | 0,895 | 0,435 | 0,954 | 0,973 |
| SCO6045 |              | 0,996 | 0,992 | 0,990 | 0,984 | 1,363 | 0,476 |
| SCO6290 |              | 1,327 | 1,050 | 1,055 | 1,100 | 0,333 | 1,675 |
| SCO6338 |              | 0,984 | 1,337 | 1,123 | 0,356 | 1,516 | 0,551 |
| SCO6403 |              | 1,136 | 1,129 | 0,681 | 0,726 | 0,498 | 1,125 |

|         |               |       |       |       |       |       |       |
|---------|---------------|-------|-------|-------|-------|-------|-------|
| SCO6480 |               | 1,250 | 1,042 | 0,698 | 0,700 | 0,438 | 1,762 |
| SCO6499 | <i>gvpO</i>   | 0,471 | 0,594 | 1,016 | 1,140 | 1,474 | 0,952 |
| SCO6547 |               | 1,441 | 1,399 | 1,079 | 1,781 | 0,690 | 2,041 |
| SCO6600 | <i>rok8A6</i> | 1,056 | 0,490 | 1,092 | 1,440 | 0,720 | 2,381 |
| SCO6624 |               | 0,746 | 0,820 | 1,018 | 0,815 | 0,815 | 4,175 |
| SCO6642 |               | 0,973 | 1,283 | 1,321 | 0,600 | 2,150 | 1,089 |
| SCO6715 | <i>wblH</i>   | 1,731 | 0,995 | 1,153 | 2,376 | 1,584 | 0,829 |
| SCO6761 |               | 0,934 | 0,951 | 0,795 | 0,584 | 1,483 | 0,462 |
| SCO6779 |               | 1,065 | 1,212 | 0,795 | 0,495 | 1,361 | 0,925 |
| SCO6810 |               | 1,220 | 0,717 | 0,920 | 1,133 | 0,368 | 1,878 |
| SCO6910 |               | 0,987 | 1,307 | 1,158 | 0,733 | 2,189 | 0,775 |
| SCO6925 |               | 0,910 | 1,195 | 1,105 | 0,521 | 2,121 | 0,623 |
| SCO6933 |               | 0,924 | 1,005 | 1,103 | 0,901 | 0,479 | 1,998 |
| SCO7086 |               | 0,963 | 0,910 | 1,028 | 0,934 | 0,488 | 1,286 |
| SCO7087 |               | 1,075 | 1,066 | 0,991 | 0,817 | 0,514 | 2,358 |
| SCO7106 |               | 1,111 | 0,893 | 1,157 | 0,980 | 0,368 | 1,548 |
| SCO7153 | <i>glcP2</i>  | 8,047 | 6,510 | 6,128 | 4,418 | 3,350 | 1,514 |
| SCO7217 |               | 1,123 | 0,996 | 0,975 | 1,172 | 1,063 | 2,339 |
| SCO7528 |               | 0,953 | 0,792 | 0,966 | 0,858 | 0,456 | 2,030 |
| SCO7552 |               | 1,196 | 1,083 | 0,959 | 1,174 | 0,383 | 2,315 |
| SCO7636 |               | 1,155 | 1,099 | 1,034 | 0,631 | 0,345 | 1,305 |
| SCO7645 |               | 0,939 | 0,866 | 0,944 | 0,867 | 0,462 | 1,254 |
| SCO7742 |               | 1,283 | 1,149 | 1,019 | 1,291 | 0,475 | 2,133 |
| SCO7752 |               | 1,009 | 0,933 | 1,045 | 1,029 | 0,466 | 1,625 |
| SCO7774 |               | 1,119 | 0,955 | 0,924 | 0,928 | 0,436 | 1,223 |
| SCO7800 |               | 1,009 | 1,781 | 1,172 | 0,590 | 2,237 | 0,833 |
| SCO7833 |               | 1,254 | 0,934 | 0,918 | 0,823 | 0,488 | 1,442 |
| SCO7836 |               | 1,107 | 0,976 | 0,987 | 1,203 | 0,413 | 3,370 |



|                 |       |      |          |    |       |      |          |    |      |       |      |                                                                              |
|-----------------|-------|------|----------|----|-------|------|----------|----|------|-------|------|------------------------------------------------------------------------------|
| SCO6659         | 2,05  | 0,58 | 2,58E-02 | 3  | 2,13  | 0,37 | 7,85E-02 | 2  | 0,01 | 2,09  | 4,25 | glucose-6-phosphate isomerase 7395031:7396683 reverse MW:60424               |
| SCO6660         | 1,84  | 0,02 | 5,77E-02 | 3  | 2,38  | 0,14 | 1,22E-03 | 3  | 0,08 | 2,11  | 4,32 | hypothetical protein SC5A7.10c 7396676:7397611 reverse MW:33918              |
| SCO6661         | 1,82  | 0,29 | 8,54E-03 | 3  | 2,48  | 0,19 | 1,06E-05 | 9  | 0,10 | 2,15  | 4,45 | glucose-6-phosphate 1-dehydrogenase 7397608:7399386 reverse MW:65672         |
| SCO6662         | 2,50  | 0,17 | 1,46E-03 | 3  | 2,81  | 0,46 | 9,00E-03 | 3  | 0,04 | 2,66  | 6,30 | transaldolase 7399383:7400528 reverse MW:40407                               |
| SCO6663         | 2,45  | 0,04 | 6,94E-05 | 3  | 2,61  | 0,07 | 7,06E-02 | 3  | 0,02 | 2,53  | 5,77 | transketolase 7400592:7402688 reverse MW:74588                               |
| SCO7638         | 1,22  | 0,12 | 8,53E-08 | 12 | 1,82  | 0,11 | 1,86E-06 | 10 | 0,12 | 1,52  | 2,86 | enolase 8466854:8468158 reverse MW:45534                                     |
| <b>External</b> |       |      |          |    |       |      |          |    |      |       |      |                                                                              |
| SCO1230         | 2,12  | 0,05 | 1,10E-02 | 2  | 0,18  | 0,06 | 1,39E-02 | 5  | 0,45 | 1,15  | 2,22 | putative secreted tripeptidylaminopeptidase 1304188:1305813 reverse MW:58517 |
| SCO2383         | 1,68  | 0,10 | 0,00E+00 | 35 | 0,49  | 0,18 | 0,00E+00 | 51 | 0,32 | 1,09  | 2,12 | putative secreted protein 2552256:2556893 forward MW:161489                  |
| SCO2920         | 2,37  | 0,19 | 5,21E-05 | 8  | 0,17  | 0,23 | 2,37E-02 | 13 | 0,46 | 1,27  | 2,40 | putative secreted protease 3169338:3171683 reverse MW:85727                  |
| SCO3097         | -0,77 | 0,16 | 9,33E-02 | 2  | -1,41 | 0,03 | 1,01E-02 | 2  | 0,18 | -1,09 | 0,47 | putative secreted protein 3392082:3392816 reverse MW:24877                   |
| SCO4157         | 4,03  | 0,08 | 8,97E-03 | 2  | 1,05  | 0,15 | 6,43E-02 | 2  | 0,34 | 2,54  | 5,82 | putative protease 4573947:4574990 reverse MW:34864                           |
| SCO6009         | 2,19  | 0,08 | 4,75E-04 | 3  | 2,47  | 0,15 | 1,28E-03 | 3  | 0,04 | 2,33  | 5,03 | periplasmic solute-binding protein 6589575:6590690 forward MW:39215          |
| SCO6281         | -0,75 | 0,24 | 3,60E-04 | 8  | -2,65 | 0,06 | 8,27E-03 | 5  | 0,33 | -1,70 | 0,31 | putative FAD-binding protein 6939907:6941544 forward MW:58522                |

## References:

1. Fedoryshyn, M., E. Welle, A. Bechthold, and A. Luzhetskyy. 2008. Functional expression of the Cre recombinase in actinomycetes. *Appl Microbiol Biotechnol* 78:1065-70.
2. Floriano, B., and M. Bibb. 1996. *afsR* is a pleiotropic but conditionally required regulatory gene for antibiotic production in *Streptomyces coelicolor* A3(2). *Mol Microbiol* 21:385-96.
3. Kieser, T., M. J. Bibb, M. J. Buttner, K. F. Chater, and D. A. Hopwood. 2000. *Practical Streptomyces genetics*. The John Innes Foundation, Norwich, United Kingdom.
4. Vara, J., M. Lewandowska-Skarbek, Y. G. Wang, S. Donadio, and C. R. Hutchinson. 1989. Cloning of genes governing the deoxysugar portion of the erythromycin biosynthesis pathway in *Saccharopolyspora erythraea* (*Streptomyces erythreus*). *J Bacteriol* 171:5872-81.
